# Supplementary material
Source: Springer Nature journal article supplement (https://www.springermedizin.de/resource/supplementary/12885_2013_4632_MOESM1_ESM.pdf/9466884)

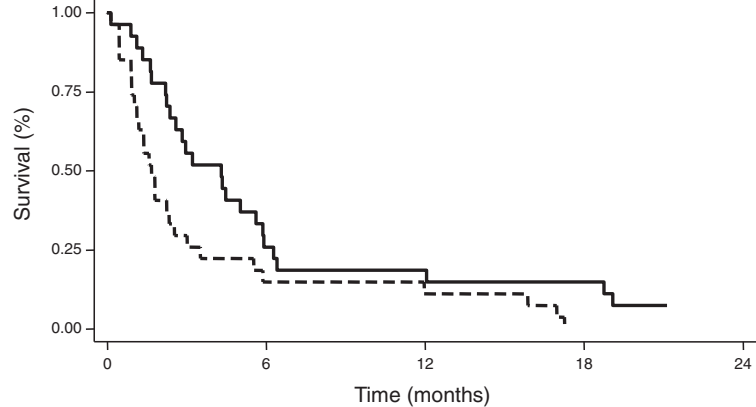

N at risk

|     | 0  | 6 | 12 | 18 | 24 |
|-----|----|---|----|----|----|
| OS  | 27 | 7 | 5  | 4  | 0  |
| PFS | 27 | 4 | 3  | 0  | 0  |

Supplement: MOESM1 [file 9466884]
